# Supplementary material for: Analysis of Real‐World Data to Investigate the Impact of Race and Ethnicity on Response to Programmed Cell Death‐1 and Programmed Cell Death‐Ligand 1 Inhibitors in Advanced Non‐Small Cell Lung Cancers
Source: PubMed Central journal article supplement — Oncologist. 2021 May 11;26(7):e1226–39. doi: 10.1002/onco.13780 (PMC8265370; doi:10.1002/onco.13780), 2021-05-11
Supplement: ONCO-26-e1226-s001.pdf [file ONCO-26-e1226-s001.pdf]

Supplemental Tables for:

Analysis of real-world data to investigate the impact of race and ethnicity on response to PD-1 and PD-L1 inhibitors in advanced NSCLC

Kristin Ayers et al.

**Table S1.** Cohort Follow Up Descriptive Statistics.

| n=249                                                | TTD               | OS                |
|------------------------------------------------------|-------------------|-------------------|
| <b>Events (%)</b>                                    | <b>142 (57.0)</b> | <b>91 (36.5)</b>  |
| <i>Died on anti PD1/PD-L1 Therapy</i>                | 63 (44.4)         | 63 (69.2)         |
| <i>Lost to follow up after/before event*</i>         | 33 (23.2)         | 9 (9.9)           |
| <b>Censored (%)</b>                                  | <b>107 (43.0)</b> | <b>158 (63.5)</b> |
| <i>Censored at end of study (complete follow up)</i> | 50 (46.7)         | 81 (51.3)         |
| <i>Drop-out (left study before event)</i>            | 57 (53.3)         | 77 (48.7)         |
| <i>Censored on anti PD1/PD-L1 Therapy</i>            | 107 (100)         | 99 (62.7)         |
| <i>Censored Drop-out on anti PD1/PD-L1 Therapy</i>   | 57 (53.3)         | 47 (29.7)         |
| <i>Censored Drop-out and likely entered Hospice</i>  | 21 (19.6)         | 31 (19.6)         |
| TTD/OS time (including censored) >6 months           | 78 (31.3)         | 140 (56.2)        |
| TTD/OS time (including censored) >1 year             | 41 (16.5)         | 75 (30.1)         |
| Only one treatment (TTD=1)                           | 40 (16.1)         |                   |

NOTE: Percentages for indented categories are based on the total number within the corresponding boldface group. \*Either 1) had treatment discontinuation but were lost to follow up before the end of study or death, or 2) died but did not have a hospital visit within 120 days of death.

Supplemental Tables for:

Analysis of real-world data to investigate the impact of race and ethnicity on response to PD-1 and PD-L1 inhibitors in advanced NSCLC

Kristin Ayers et al.

**Table S2.** Hazard Ratios for single variable cox regression.

| Group                                | n (%)      | HR TTD (95% CI)  | pval TTD | HR OS (95% CI)   | pval OS |
|--------------------------------------|------------|------------------|----------|------------------|---------|
| Age at Rx initiation (yrs)           | 249 (100)  | 0.99 (0.97-1.01) | 0.381    | 1.01 (0.99-1.04) | 0.244   |
| <i>Age at Rx initiation (yrs)</i>    |            |                  |          |                  |         |
| < 50                                 | 7 (2.8)    | 1.23 (0.49-3.09) | 0.654    | 0.88 (0.21-3.68) | 0.862   |
| 50-64                                | 92 (36.9)  | Ref              | -        | Ref              | -       |
| 65-74                                | 96 (38.6)  | 1.06 (0.73-1.53) | 0.776    | 1.11 (0.69-1.79) | 0.660   |
| 75+                                  | 54 (21.7)  | 0.77 (0.48-1.25) | 0.297    | 1.11 (0.63-1.93) | 0.724   |
| BMI                                  | 249 (100)  | 1.00 (0.97-1.02) | 0.823    | 0.99 (0.95-1.02) | 0.392   |
| <i>Gender</i>                        |            |                  |          |                  |         |
| Female                               | 122 (49.0) | Ref              | -        | Ref              | -       |
| Male                                 | 127 (51.0) | 0.92 (0.66-1.28) | 0.639    | 1.58 (1.04-2.39) | 0.033   |
| <i>Race/Ethnicity</i>                |            |                  |          |                  |         |
| White                                | 110 (44.2) | Ref              | -        | Ref              | -       |
| Asian                                | 24 (9.6)   | 0.90 (0.51-1.57) | 0.708    | 0.43 (0.19-1.01) | 0.053   |
| African American                     | 75 (30.1)  | 0.64 (0.42-0.96) | 0.032    | 0.58 (0.35-0.96) | 0.035   |
| Hispanic                             | 35 (14.1)  | 0.94 (0.59-1.50) | 0.793    | 0.69 (0.38-1.25) | 0.217   |
| Other/Unknown                        | 5 (2.0)    | -                | -        | -                | -       |
| <i>Smoking Status</i>                |            |                  |          |                  |         |
| Current Smoker                       | 90 (36.1)  | Ref              | -        | Ref              | -       |
| Former Smoker                        | 117 (47.0) | 1.18 (0.81-1.72) | 0.380    | 1.34 (0.86-2.10) | 0.201   |
| Never Smoker                         | 38 (15.3)  | 1.84 (1.14-2.96) | 0.012    | 0.73 (0.36-1.48) | 0.382   |
| Not Reported                         | 4 (1.6)    | -                | -        | -                | -       |
| <i>Histology</i>                     |            |                  |          |                  |         |
| Non-squamous cc*                     | 189 (75.9) | Ref              | -        | Ref              | -       |
| Squamous cc*                         | 48 (19.3)  | 0.71 (0.45-1.12) | 0.141    | 0.90 (0.53-1.53) | 0.693   |
| NSCLC, Nos                           | 12 (4.8)   | 1.43 (0.67-3.08) | 0.358    | 1.07 (0.39-2.95) | 0.889   |
| <i>PDL1 Status</i>                   |            |                  |          |                  |         |
| Negative                             | 52 (20.9)  | Ref              | -        | Ref              | -       |
| Not tested                           | 119 (47.8) | 1.15 (0.74-1.78) | 0.533    | 1.06 (0.63-1.80) | 0.822   |
| Positive                             | 78 (31.3)  | 0.94 (0.58-1.52) | 0.812    | 0.62 (0.33-1.17) | 0.143   |
| <i>Targeted Mutation in EGFR/ALK</i> |            |                  |          |                  |         |
| Mutation Absent                      | 157 (63.1) | Ref              | -        | Ref              | -       |
| Mutation Present                     | 25 (10.0)  | 1.20 (0.69-2.07) | 0.518    | 1.69 (0.90-3.16) | 0.102   |
| Not tested                           | 67 (26.9)  | 0.74 (0.49-1.11) | 0.144    | 1.08 (0.67-1.76) | 0.749   |
| <i>Line of Treatment</i>             |            |                  |          |                  |         |
| 1                                    | 113 (45.4) | Ref              | -        | Ref              | -       |
| 2                                    | 102 (41.0) | 1.08 (0.75-1.56) | 0.672    | 1.48 (0.94-2.32) | 0.089   |
| 3 or more                            | 34 (13.7)  | 1.17 (0.93-1.48) | 0.175    | 1.19 (0.89-1.58) | 0.244   |
| <i>Concurrent Chemotherapy</i>       |            |                  |          |                  |         |
| No                                   | 201 (80.7) | Ref              | -        | Ref              | -       |
| Yes                                  | 48 (19.3)  | 0.64 (0.41-1.01) | 0.055    | 0.63 (0.34-1.16) | 0.142   |

Supplemental Tables for:

Analysis of real-world data to investigate the impact of race and ethnicity on response to PD-1 and PD-L1 inhibitors in advanced NSCLC

Kristin Ayers et al.

| <i>Drug</i>                  |            |                  |       |                  |       |
|------------------------------|------------|------------------|-------|------------------|-------|
| Atezolizumab                 | 59 (24.1)  | Ref              | -     | Ref              | -     |
| Nivolumab                    | 84 (34.3)  | 0.69 (0.45-1.06) | 0.091 | 1.32 (0.77-2.26) | 0.310 |
| Pembrolizumab                | 102 (41.6) | 0.65 (0.43-0.99) | 0.047 | 0.91 (0.51-1.60) | 0.736 |
| More than one                | 4 (1.6)    | -                | -     | -                | -     |
| <i>Disease Comorbidities</i> |            |                  |       |                  |       |
| None Reported                | 128 (51.4) | Ref              | -     | Ref              | -     |
| Asthma                       | 44 (17.7)  | 0.89 (0.58-1.39) | 0.618 | 0.80 (0.44-1.46) | 0.472 |
| COPD (inc. Emphysema)        | 77 (30.9)  | 0.67 (0.45-0.99) | 0.044 | 1.08 (0.68-1.70) | 0.752 |

\*cell carcinoma; Rx corresponds to anti PD1/PD-L1 therapy

Supplemental Tables for:

Analysis of real-world data to investigate the impact of race and ethnicity on response to PD-1 and PD-L1 inhibitors in advanced NSCLC

Kristin Ayers et al.

**Table S3.** Group Characteristics Before Matching

|                                   | White      | African American | p-value | SMD   |
|-----------------------------------|------------|------------------|---------|-------|
| n                                 | 110        | 75               |         |       |
| <b>Clinical Variables</b>         |            |                  |         |       |
| BMI (mean (SD))                   | 28.3 (6.3) | 26.7 (6.2)       | 0.091   | 0.255 |
| Age at Rx Initiation (mean (SD))  | 70.5 (8.2) | 65.0 (9.4)       | <0.001  | 0.610 |
| Age at Rx Initiation in Years (%) |            |                  | 0.005   | 0.544 |
| <50                               | 0 (0.0)    | 1 (1.3)          |         |       |
| 50-64                             | 30 (27.3)  | 38 (50.7)        |         |       |
| 65-74                             | 49 (44.5)  | 24 (32.0)        |         |       |
| 75+                               | 31 (28.2)  | 12 (16.0)        |         |       |
| Gender (%)                        |            |                  | 1.000   | 0.013 |
| Female                            | 55 (50.0)  | 37 (49.3)        |         |       |
| Male                              | 55 (50.0)  | 38 (50.7)        |         |       |
| Smoking Status (%)                |            |                  | 0.030   | 0.443 |
| Current Smoker                    | 36 (32.7)  | 37 (49.3)        |         |       |
| Former Smoker                     | 62 (56.4)  | 31 (41.3)        |         |       |
| Never Smoker                      | 12 (10.9)  | 5 (6.7)          |         |       |
| Unknown                           | 0 (0.0)    | 2 (2.7)          |         |       |
| Histology (%)                     |            |                  | 0.122   | 0.306 |
| Non-squamous cell carcinoma       | 88 (80.0)  | 50 (66.7)        |         |       |
| Squamous cell carcinoma           | 18 (16.4)  | 20 (26.7)        |         |       |
| NSCLC, Nos                        | 4 (3.6)    | 5 (6.7)          |         |       |
| PDL1 Status (%)                   |            |                  | 0.263   | 0.249 |
| Negative                          | 28 (25.5)  | 12 (16.0)        |         |       |
| Not tested                        | 47 (42.7)  | 39 (52.0)        |         |       |
| Positive                          | 35 (31.8)  | 24 (32.0)        |         |       |
| Targeted Mutation EGFR/ALK (%)    |            |                  | 0.047   | 0.375 |
| Mutation Absent                   | 74 (67.3)  | 43 (57.3)        |         |       |
| Mutation Present                  | 12 (10.9)  | 4 (5.3)          |         |       |
| Not tested                        | 24 (21.8)  | 28 (37.3)        |         |       |
| Comorbidities (%)                 |            |                  | 0.012   | 0.444 |
| Asthma                            | 11 (10.0)  | 19 (25.3)        |         |       |
| COPD (including Emphysema)        | 46 (41.8)  | 21 (28.0)        |         |       |
| Unknown or Not reported           | 53 (48.2)  | 35 (46.7)        |         |       |
| <b>Treatment Variables</b>        |            |                  |         |       |
| Drug (%)                          |            |                  | 0.416   | 0.256 |
| Atezolizumab                      | 24 (21.8)  | 22 (29.3)        |         |       |
| Nivolumab                         | 40 (36.4)  | 20 (26.7)        |         |       |
| Pembrolizumab                     | 43 (39.1)  | 32 (42.7)        |         |       |

Supplemental Tables for:

Analysis of real-world data to investigate the impact of race and ethnicity on response to PD-1 and PD-L1 inhibitors in advanced NSCLC

Kristin Ayers et al.

|                                    |             |             |       |       |
|------------------------------------|-------------|-------------|-------|-------|
| More than one                      | 3 (2.7)     | 1 (1.3)     |       |       |
| Concurrent Chemotherapy (%)        | 16 (14.5)   | 17 (22.7)   | 0.222 | 0.210 |
| <i>Line of Treatment (%)</i>       |             |             | 0.162 | 0.352 |
| 1                                  | 43 (39.1)   | 39 (52.0)   |       |       |
| 2                                  | 45 (40.9)   | 29 (38.7)   |       |       |
| 3                                  | 17 (15.5)   | 6 (8.0)     |       |       |
| 4 or more                          | 5 (4.5)     | 1 (1.3)     |       |       |
| <i>Rx Year (%)</i>                 |             |             | 0.126 | 0.374 |
| Pre 2016                           | 10 (9.1)    | 7 (9.3)     |       |       |
| 2016                               | 22 (20.0)   | 6 (8.0)     |       |       |
| 2017                               | 40 (36.4)   | 36 (48.0)   |       |       |
| 2018                               | 38 (34.5)   | 26 (34.7)   |       |       |
| Completed Study (%)                | 72 (65.5)   | 49 (65.3)   | 1.000 | 0.003 |
| Drop-Out (%)                       | 33 (30.0)   | 25 (33.3)   | 0.750 | 0.072 |
| Total Follow Time mo* (mean (SD))  | 66.9 (53.3) | 59.2 (49.3) | 0.322 | 0.150 |
| Patient (>5 years follow time) (%) | 49 (44.5)   | 29 (38.7)   | 0.520 | 0.119 |
| Follow up at Rx mo* (mean (SD))    | 17.3 (12.8) | 15.6 (12.3) | 0.357 | 0.139 |
| <b><u>Outcome</u></b>              |             |             |       |       |
| Death (%)                          | 49 (44.5)   | 21 (28.0)   | 0.034 | 0.349 |

\*months; Rx corresponds to anti PD1/PD-L1 therapy

Supplemental Tables for:

Analysis of real-world data to investigate the impact of race and ethnicity on response to PD-1 and PD-L1 inhibitors in advanced NSCLC

Kristin Ayers et al.

**Table S4.** Group Characteristics After Matching

|                                   | White      | African American | p-value | SMD   |
|-----------------------------------|------------|------------------|---------|-------|
| n                                 | 75         | 75               |         |       |
| <b><u>Clinical Variables</u></b>  |            |                  |         |       |
| BMI (mean (SD))                   | 28.5 (6.1) | 26.7 (6.2)       | 0.089   | 0.279 |
| Age at Rx Initiation (mean (SD))  | 71.1 (9.0) | 65.0 (9.4)       | <0.001  | 0.664 |
| Age at Rx Initiation in Years (%) |            |                  | 0.009   | 0.576 |
| <50                               | 0 (0.0)    | 1 (1.3)          |         |       |
| 50-64                             | 20 (26.7)  | 38 (50.7)        |         |       |
| 65-74                             | 31 (41.3)  | 24 (32.0)        |         |       |
| 75+                               | 24 (32.0)  | 12 (16.0)        |         |       |
| Gender (%)                        |            |                  | 0.623   | 0.107 |
| Female                            | 33 (44.0)  | 37 (49.3)        |         |       |
| Male                              | 42 (56.0)  | 38 (50.7)        |         |       |
| Smoking Status (%)                |            |                  | 0.060   | 0.456 |
| Current Smoker                    | 24 (32.0)  | 37 (49.3)        |         |       |
| Former Smoker                     | 43 (57.3)  | 31 (41.3)        |         |       |
| Never Smoker                      | 8 (10.7)   | 5 (6.7)          |         |       |
| Not Reported                      | 0 (0.0)    | 2 (2.7)          |         |       |
| Histology (%)                     |            |                  | 0.335   | 0.243 |
| Non-squamous cell carcinoma       | 58 (77.3)  | 50 (66.7)        |         |       |
| Squamous cell carcinoma           | 13 (17.3)  | 20 (26.7)        |         |       |
| NSCLC, Nos                        | 4 (5.3)    | 5 (6.7)          |         |       |
| PDL1 Status (%)                   |            |                  | 0.137   | 0.330 |
| Negative                          | 20 (26.7)  | 12 (16.0)        |         |       |
| Not tested                        | 28 (37.3)  | 39 (52.0)        |         |       |
| Positive                          | 27 (36.0)  | 24 (32.0)        |         |       |
| Targeted Mutation EGFR/ALK (%)    |            |                  | 0.142   | 0.327 |
| Mutation Absent                   | 49 (65.3)  | 43 (57.3)        |         |       |
| Mutation Present                  | 8 (10.7)   | 4 (5.3)          |         |       |
| Not tested                        | 18 (24.0)  | 28 (37.3)        |         |       |
| Comorbidities (%)                 |            |                  | 0.053   | 0.404 |
| Asthma                            | 9 (12.0)   | 19 (25.3)        |         |       |
| COPD (including Emphysema)        | 32 (42.7)  | 21 (28.0)        |         |       |
| Unknown or Not reported           | 34 (45.3)  | 35 (46.7)        |         |       |
| <b><u>Treatment Variables</u></b> |            |                  |         |       |
| Drug (%)                          |            |                  | 0.322   | 0.309 |
| Atezolizumab                      | 13 (17.3)  | 22 (29.3)        |         |       |
| Nivolumab                         | 26 (34.7)  | 20 (26.7)        |         |       |
| Pembrolizumab                     | 34 (45.3)  | 32 (42.7)        |         |       |

Supplemental Tables for:

Analysis of real-world data to investigate the impact of race and ethnicity on response to PD-1 and PD-L1 inhibitors in advanced NSCLC

Kristin Ayers et al.

|                                    |             |             |       |       |
|------------------------------------|-------------|-------------|-------|-------|
| More than one                      | 2 (2.7)     | 1 (1.3)     |       |       |
| Concurrent Chemotherapy (%)        | 11 (14.7)   | 17 (22.7)   | 0.295 | 0.206 |
| <i>Line of Treatment (%)</i>       |             |             | 0.691 | 0.198 |
| 1                                  | 38 (50.7)   | 39 (52.0)   |       |       |
| 2                                  | 26 (34.7)   | 29 (38.7)   |       |       |
| 3                                  | 8 (10.7)    | 6 (8.0)     |       |       |
| 4 or more                          | 3 (4.0)     | 1 (1.3)     |       |       |
| <i>Rx Year (%)</i>                 |             |             | 0.113 | 0.407 |
| Pre 2016                           | 5 (6.7)     | 7 (9.3)     |       |       |
| 2016                               | 15 (20.0)   | 6 (8.0)     |       |       |
| 2017                               | 26 (34.7)   | 36 (48.0)   |       |       |
| 2018                               | 29 (38.7)   | 26 (34.7)   |       |       |
| Completed Study (%)                | 50 (66.7)   | 49 (65.3)   | 1.000 | 0.028 |
| Drop-Out (%)                       | 24 (32.0)   | 25 (33.3)   | 1.000 | 0.028 |
| Total Follow Time mo* (mean (SD))  | 64.5 (49.7) | 59.2 (49.3) | 0.513 | 0.107 |
| Patient (>5 years follow time) (%) | 34 (45.3)   | 29 (38.7)   | 0.508 | 0.135 |
| Follow up at RX mo* (mean (SD))    | 16.0 (12.4) | 15.6 (12.3) | 0.829 | 0.035 |
| <b>Outcome</b>                     |             |             |       |       |
| Death (%)                          | 33 (44.0)   | 21 (28.0)   | 0.061 | 0.338 |

\*months; Rx corresponds to anti PD1/PD-L1 therapy

Supplemental Tables for:

Analysis of real-world data to investigate the impact of race and ethnicity on response to PD-1 and PD-L1 inhibitors in advanced NSCLC

Kristin Ayers et al.

**Table S5:** Multivariable cox regression for the African American and White matched cohort. Those with unknown smoking status and NSCLC Nos histology were excluded due to small numbers within in these categories.

| Variable/Category                 | n=141 (%)  | TTD              |         | OS               |         |
|-----------------------------------|------------|------------------|---------|------------------|---------|
|                                   |            | aHR (95% CI)     | P-value | aHR (95% CI)     | P-value |
| <i>Race/Ethnicity</i>             |            |                  |         |                  |         |
| White                             | 73 (51.8)  | Ref              | -       | Ref              | -       |
| African American                  | 68 (48.2)  | 0.51 (0.31-0.86) | 0.011   | 0.53 (0.28-1.01) | 0.054   |
| Age at Rx Initiation (yrs)        | 141 (100)  | 0.98 (0.95-1.01) | 0.180   | 1.00 (0.96-1.04) | 0.940   |
| BMI                               | 141 (100)  | 0.95 (0.91-1.00) | 0.040   | 0.95 (0.90-1.01) | 0.100   |
| <i>Gender</i>                     |            |                  |         |                  |         |
| Female                            | 66 (46.8)  | Ref              | -       | Ref              | -       |
| Male                              | 75 (53.2)  | 1.32 (0.81-2.16) | 0.263   | 1.79 (0.98-3.27) | 0.057   |
| <i>Smoking Status</i>             |            |                  |         |                  |         |
| Smoker*                           | 128 (90.8) | Ref              | -       | Ref              | -       |
| Never Smoker                      | 13 (9.2)   | 1.32 (0.59-2.95) | 0.496   | 1.31 (0.47-3.66) | 0.610   |
| <i>PDL1 Status</i>                |            |                  |         |                  |         |
| Negative                          | 32 (22.7)  | Ref              | -       | Ref              | -       |
| Not tested                        | 61 (43.3)  | 0.67 (0.35-1.29) | 0.234   | 0.48 (0.23-1.00) | 0.050   |
| Positive                          | 48 (34.0)  | 0.66 (0.34-1.27) | 0.216   | 0.40 (0.18-0.90) | 0.027   |
| <i>Targeted Mutation EGFR/ALK</i> |            |                  |         |                  |         |
| Mutation Absent                   | 88 (62.4)  | Ref              | -       | Ref              | -       |
| Mutation Present                  | 12 (8.5)   | 0.92 (0.32-2.68) | 0.877   | 1.52 (0.49-4.69) | 0.465   |
| Not tested                        | 41 (29.1)  | 1.09 (0.48-2.48) | 0.836   | 1.17 (0.44-3.10) | 0.746   |
| <i>Histology</i>                  |            |                  |         |                  |         |
| Nonsquamous cc**                  | 107 (75.9) | Ref              | -       | Ref              | -       |
| Squamous cell cc**                | 34 (24.1)  | 0.67 (0.29-1.56) | 0.355   | 0.60 (0.22-1.68) | 0.332   |
| <i>Line of Treatment</i>          |            |                  |         |                  |         |
| First                             | 71 (50.4)  | Ref              | -       | Ref              | -       |
| Second or Higher                  | 70 (49.6)  | 1.23 (0.72-2.12) | 0.448   | 1.37 (0.69-2.74) | 0.370   |
| <i>Concurrent Chemotherapy</i>    |            |                  |         |                  |         |
| No                                | 115 (81.6) | Ref              | -       | Ref              | -       |
| Yes                               | 26 (18.4)  | 0.48 (0.22-1.07) | 0.073   | 0.44 (0.17-1.16) | 0.095   |
| <i>Disease Comorbidities</i>      |            |                  |         |                  |         |
| None Reported                     | 64 (45.4)  | Ref              | -       | Ref              | -       |
| Asthma                            | 27 (19.1)  | 1.05 (0.56-1.97) | 0.886   | 0.84 (0.35-1.99) | 0.692   |
| COPD (inc. Emphysema)             | 50 (35.5)  | 0.69 (0.40-1.21) | 0.199   | 0.90 (0.47-1.72) | 0.760   |

\*Current or Former Smoker; \*\*cell carcinoma; Rx corresponds to anti PD1/PD-L1 therapy



Supplemental Tables for:

Analysis of real-world data to investigate the impact of race and ethnicity on response to PD-1 and PD-L1 inhibitors in advanced NSCLC

Kristin Ayers et al.

**Table S6.** HRs for single variable cox regression for OS in smokers without EGFR/ALK mutations (n=195).

| <b>Variable/Category</b>            | <b>n (%)</b> | <b>HR OS (95% CI)</b> | <b>P-value</b> |
|-------------------------------------|--------------|-----------------------|----------------|
| Age at Rx Initiation                | 195 (100)    | 1.01 (0.98-1.03)      | 0.644          |
| <i>Age at Rx Category (yrs)</i>     |              |                       |                |
| <50                                 | 4 (2.1)      | -                     | -              |
| 50-64                               | 77 (39.5)    | Ref                   | -              |
| 65-74                               | 72 (36.9)    | 1.06 (0.63-1.80)      | 0.825          |
| 75+                                 | 42 (21.5)    | 0.97 (0.51-1.85)      | 0.920          |
| BMI                                 | 195 (100)    | 0.99 (0.95-1.02)      | 0.474          |
| <i>Gender</i>                       |              |                       |                |
| Female                              | 86 (44.1)    | Ref                   | -              |
| Male                                | 109 (55.9)   | 1.43 (0.88-2.30)      | 0.146          |
| <i>Race/Ethnicity</i>               |              |                       |                |
| White                               | 91 (46.7)    | Ref                   | -              |
| Asian                               | 10 (5.1)     | 0.56 (0.17-1.80)      | 0.329          |
| African American                    | 65 (33.3)    | 0.55 (0.31-0.97)      | 0.039          |
| Hispanic                            | 25 (12.8)    | 0.78 (0.40-1.52)      | 0.466          |
| Other/Unknown                       | 4 (2.1)      | -                     | -              |
| <i>Histology</i>                    |              |                       |                |
| Nonsquamous cell carcinoma          | 139 (71.6)   | Ref                   | -              |
| Squamous cell carcinoma             | 44 (22.7)    | 0.75 (0.41-1.35)      | 0.330          |
| NSCLC, Nos                          | 11 (5.7)     | 1.24 (0.45-3.43)      | 0.676          |
| <i>PDL1 Status</i>                  |              |                       |                |
| Negative                            | 45 (23.1)    | Ref                   | -              |
| Not tested                          | 89 (45.6)    | 0.92 (0.53-1.62)      | 0.782          |
| Positive                            | 61 (31.3)    | 0.55 (0.28-1.10)      | 0.090          |
| <i>Line of Treatment</i>            |              |                       |                |
| First                               | 89 (45.6)    | Ref                   | -              |
| Second or Higher                    | 106 (54.4)   | 1.38 (0.85-2.25)      | 0.195          |
| <i>Concurrent with Chemotherapy</i> |              |                       |                |
| No                                  | 160 (82.5)   | Ref                   | -              |
| Yes                                 | 34 (17.5)    | 0.86 (0.44-1.68)      | 0.651          |
| <i>Disease Comorbidities</i>        |              |                       |                |
| None Reported                       | 89 (45.6)    | Ref                   | -              |
| Asthma                              | 35 (17.9)    | 0.90 (0.47-1.72)      | 0.753          |
| COPD (inc. Emphysema)               | 71 (36.4)    | 0.97 (0.58-1.63)      | 0.920          |

Rx corresponds to anti PD1/PD-L1 therapy

Supplemental Tables for:

Analysis of real-world data to investigate the impact of race and ethnicity on response to PD-1 and PD-L1 inhibitors in advanced NSCLC

Kristin Ayers et al.

**Table S7.** Subgroup analysis for First and Higher Line of Treatment with single variable cox regression for OS.

| Variable/Category                   | First LOT |                  |        | Second or Higher LOT |                  |        |
|-------------------------------------|-----------|------------------|--------|----------------------|------------------|--------|
|                                     | n=113     | HR OS (95% CI)   | Pvalue | n=136                | HR OS (95% CI)   | Pvalue |
| Age at Rx Initiation                | 113 (100) | 1.01 (0.97-1.05) | 0.622  | 136 (100)            | 1.02 (0.99-1.05) | 0.258  |
| <i>Age Rx Category (yrs)</i>        |           |                  |        |                      |                  |        |
| <50                                 | 1 (0.9)   | -                | -      | 6 (4.4)              | -                | -      |
| 50-64                               | 39 (34.5) | Ref              | -      | 53 (39.0)            | Ref              | -      |
| 65-74                               | 41 (36.3) | 0.82 (0.35-1.95) | 0.654  | 55 (40.4)            | 1.18 (0.66-2.09) | 0.582  |
| 75+                                 | 32 (28.3) | 1.28 (0.55-2.95) | 0.570  | 22 (16.2)            | 0.98 (0.46-2.10) | 0.960  |
| BMI                                 | 113 (100) | 0.97 (0.92-1.03) | 0.339  | 136 (100)            | 0.99 (0.95-1.03) | 0.694  |
| <i>Gender</i>                       |           |                  |        |                      |                  |        |
| Female                              | 56 (49.6) | Ref              | -      | 66 (48.5)            | Ref              | -      |
| Male                                | 57 (50.4) | 2.14 (1.03-4.45) | 0.042  | 70 (51.5)            | 1.34 (0.80-2.25) | 0.259  |
| <i>Smoking Status</i>               |           |                  |        |                      |                  |        |
| Smoker*                             | 95 (84.1) | Ref              | -      | 116 (85.3)           | Ref              | -      |
| Never Smoker                        | 18 (15.9) | 0.64 (0.22-1.82) | 0.399  | 20 (14.7)            | 0.63 (0.27-1.47) | 0.285  |
| Not reported                        | 2 (1.8)   | -                | -      | 2(1.5)               | -                | -      |
| <i>Race/Ethnicity</i>               |           |                  |        |                      |                  |        |
| White                               | 43 (38.1) | Ref              | -      | 67 (49.3)            | Ref              | -      |
| Asian                               | 14 (12.4) | 0.27 (0.06-1.16) | 0.078  | 10 (7.4)             | 0.77 (0.27-2.18) | 0.620  |
| African American                    | 39 (34.5) | 0.61 (0.27-1.37) | 0.229  | 36 (26.5)            | 0.58 (0.30-1.13) | 0.110  |
| Hispanic                            | 14 (12.4) | 0.63 (0.21-1.89) | 0.408  | 21 (15.4)            | 0.74 (0.36-1.49) | 0.397  |
| Other/Unknown                       | 3 (1.8)   | -                | -      | 2 (2.2)              | -                | -      |
| <i>Histology</i>                    |           |                  |        |                      |                  |        |
| Nonsquamous cc**                    | 88 (77.9) | Ref              | -      | 101 (74.3)           | Ref              | -      |
| Squamous cc**                       | 18 (15.9) | 1.77 (0.76-4.14) | 0.189  | 30 (22.1)            | 0.59 (0.30-1.17) | 0.133  |
| NSCLC, Nos                          | 7 (6.2)   | -                | -      | 5 (3.7)              | -                | -      |
| <i>Targeted Mutation EGFR/ALK</i>   |           |                  |        |                      |                  |        |
| Mutation Absent                     | 76 (67.3) | Ref              | -      | 81 (59.6)            | Ref              | -      |
| Mutation Present                    | 7 (6.2)   | -                | -      | 18 (13.2)            | 1.70 (0.81-3.54) | 0.160  |
| Not tested                          | 30 (26.5) | 2.11 (0.99-4.05) | 0.053  | 37 (27.2)            | 0.67 (0.35-1.28) | 0.221  |
| <i>PDL1 Status</i>                  |           |                  |        |                      |                  |        |
| Negative                            | 23 (20.4) | Ref              | -      | 29 (21.3)            | Ref              | -      |
| Not tested                          | 37 (32.7) | 0.64 (0.25-1.63) | 0.353  | 82 (60.3)            | 1.27 (0.65-2.48) | 0.476  |
| Positive                            | 53 (46.9) | 0.75 (0.31-1.79) | 0.516  | 25 (18.4)            | 0.46 (0.17-1.24) | 0.124  |
| <i>Concurrent with Chemotherapy</i> |           |                  |        |                      |                  |        |
| No                                  | 78 (69)   | Ref              | -      | 123 (90.4)           | Ref              | -      |
| Yes                                 | 35 (31)   | 1.16 (0.56-2.43) | 0.686  | 13 (9.6)             | 0.14 (0.02-0.98) | 0.047  |
| <i>Disease Comorbidities</i>        |           |                  |        |                      |                  |        |
| None Reported                       | 59 (52.2) | Ref              | -      | 69 (50.7)            | Ref              | -      |
| Asthma                              | 23 (20.4) | 0.71 (0.27-1.83) | 0.478  | 21 (15.4)            | 1.10 (0.51-2.41) | 0.802  |
| COPD (Emphysema)                    | 31 (27.4) | 1.31 (0.60-2.86) | 0.496  | 46 (33.8)            | 0.97 (0.55-1.70) | 0.911  |

\*Current or Former Smoker; \*\*cell carcinoma; Rx corresponds to anti PD1/PD-L1 therapy

Supplemental Tables for:

Analysis of real-world data to investigate the impact of race and ethnicity on response to PD-1 and PD-L1 inhibitors in advanced NSCLC

Kristin Ayers et al.

**Table S8.** HRs for single variable cox regression for OS within Race.

| Variable/Category                 | White     |                  |         | African American |                  |         |
|-----------------------------------|-----------|------------------|---------|------------------|------------------|---------|
|                                   | n=110(%)  | HR OS (95% CI)   | p-value | n=75 (%)         | HR OS (95% CI)   | p-value |
| Age at Rx Initiation              | 110 (100) | 1.02 (0.99-1.06) | 0.236   | 75 (100)         | 0.97 (0.92-1.02) | 0.233   |
| <i>Age Rx Category (yrs)</i>      |           |                  |         |                  |                  |         |
| <50                               | 0 (0.0)   | -                | -       | 1 (1.3)          | -                | -       |
| 50-64                             | 30 (27.3) | Ref              | -       | 38 (50.7)        | Ref              | -       |
| 65-74                             | 49 (44.5) | 1.17 (0.58-2.33) | 0.664   | 24 (32)          | 0.56 (0.20-1.56) | 0.266   |
| 75+                               | 31 (28.2) | 1.06 (0.48-2.33) | 0.879   | 12 (16)          | 0.48 (0.11-2.11) | 0.330   |
| BMI                               | 110 (100) | 0.99 (0.94-1.03) | 0.586   | 75 (100)         | 0.95 (0.87-1.03) | 0.198   |
| <i>Gender</i>                     |           |                  |         |                  |                  |         |
| Female                            | 55 (50)   | Ref              | -       | 37 (49.3)        | Ref              | -       |
| Male                              | 55 (50)   | 1.59 (0.90-2.82) | 0.111   | 38 (50.7)        | 1.76 (0.73-4.26) | 0.207   |
| <i>Smoking Status</i>             |           |                  |         |                  |                  |         |
| Smoker*                           | 98 (89.1) | Ref              | -       | 68 (90.1)        | -                | -       |
| Never Smoker                      | 12 (10.9) | 0.69 (0.25-1.91) | 0.472   | 5 (6.7)          | -                | -       |
| Not Reported                      | 0 (0.0)   | -                | -       | 2 (2.7)          | -                | -       |
| <i>Histology</i>                  |           |                  |         |                  |                  |         |
| Nonsquamous cell cc**             | 88 (80)   | Ref              | -       | 50 (66.7)        | Ref              | -       |
| Squamous cell cc**                | 18 (16.4) | 1.27 (0.62-2.64) | 0.515   | 20 (26.7)        | 0.50 (0.17-1.49) | 0.210   |
| NSCLC, Nos                        |           |                  |         |                  |                  |         |
| <i>Targeted Mutation EGFR/ALK</i> |           |                  |         |                  |                  |         |
| Mutation Absent                   | 74 (67.3) | Ref              | -       | 43 (57.3)        | Ref              | -       |
| Mutation Present                  | 12 (10.9) | 2.00 (0.87-4.59) | 0.101   | 4 (5.3)          | -                | -       |
| Not tested                        | 24 (21.8) | 2.01 (1.04-3.88) | 0.037   | 28 (37.3)        | 0.55 (0.20-1.53) | 0.254   |
| <i>PDL1 Status</i>                |           |                  |         |                  |                  |         |
| Negative                          | 28 (25.5) | Ref              | -       | 12 (16.0)        | Ref              | -       |
| Not tested                        | 47 (42.7) | 0.69 (0.34-1.37) | 0.286   | 39 (52.0)        | 1.62 (0.46-5.71) | 0.449   |
| Positive                          | 35 (31.8) | 0.44 (0.20-0.97) | 0.042   | 24 (32.0)        | 1.11 (0.26-4.63) | 0.891   |
| <i>Line of Treatment</i>          |           |                  |         |                  |                  |         |
| First                             | 43 (39.1) | Ref              | -       | 39 (52.0)        | Ref              | -       |
| Second or Higher                  | 67 (60.9) | 1.25 (0.68-2.26) | 0.472   | 36 (48.0)        | 1.21 (0.51-2.88) | 0.666   |
| <i>Concurrent Chemotherapy</i>    |           |                  |         |                  |                  |         |
| No                                | 94 (85.5) | Ref              | -       | 58 (77.3)        | Ref              | -       |
| Yes                               | 16 (14.5) | 0.75 (0.32-1.76) | 0.506   | 17 (22.7)        | 0.61 (0.18-2.09) | 0.431   |
| <i>Disease Comorbidities</i>      |           |                  |         |                  |                  |         |
| None Reported                     | 53 (48.2) | Ref              | -       | 35 (46.7)        | Ref              | -       |
| Asthma                            | 11 (10.0) | 0.74 (0.25-2.14) | 0.576   | 19 (25.3)        | 1.00 (0.36-2.76) | 0.997   |
| COPD (Emphysema)                  | 46 (41.8) | 1.26 (0.70-2.26) | 0.444   | 21 (28.0)        | 0.64 (0.22-1.89) | 0.421   |

\*Current or Former Smoker; \*\*cell carcinoma; Rx corresponds to anti PD1/PD-L1 therapy
