# Supplementary figures and images for: Analysis of Real‐World Data to Investigate the Impact of Race and Ethnicity on Response to Programmed Cell Death‐1 and Programmed Cell Death‐Ligand 1 Inhibitors in Advanced Non‐Small Cell Lung Cancers
Source: PubMed Central journal article supplement — Oncologist. 2021 May 11;26(7):e1226–39. doi: 10.1002/onco.13780 (PMC8265370; doi:10.1002/onco.13780), 2021-05-11

**A****TTD Matched**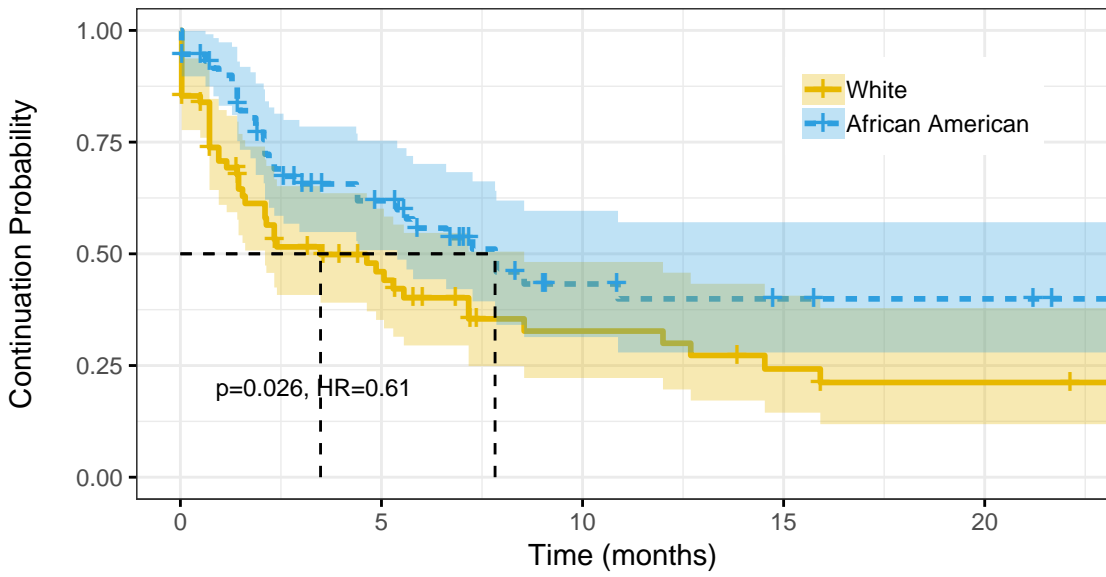**Number at risk (number censored)**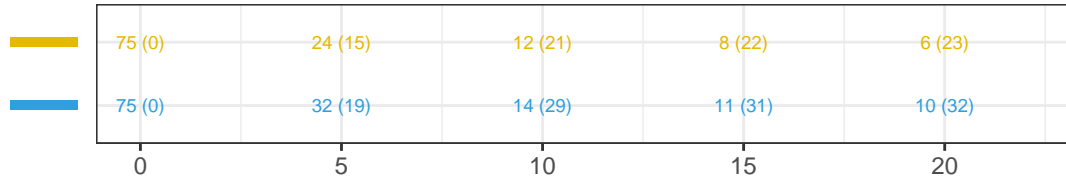**B****OS Matched**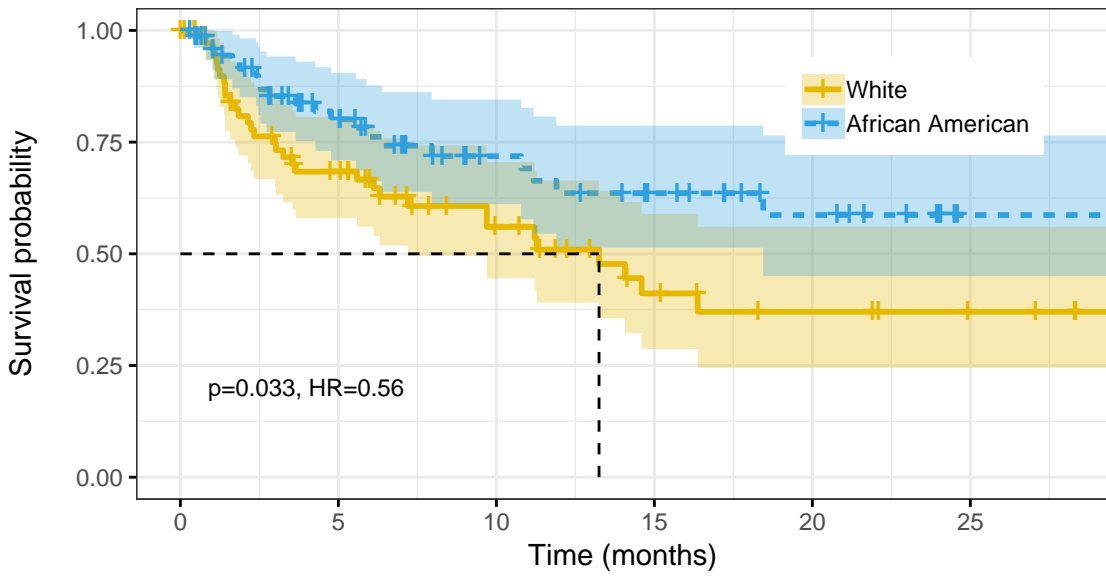**Number at risk (number censored)**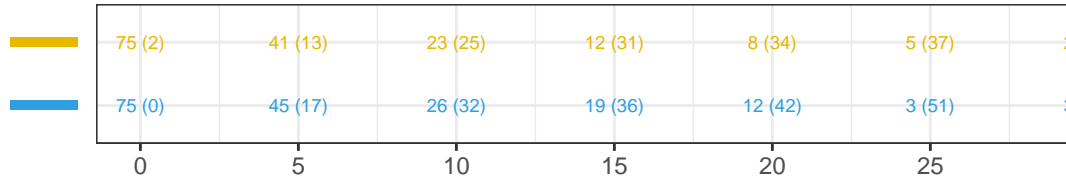

Supplement: ONCO-26-e1226-s003.pdf [file ONCO-26-e1226-s003.pdf]
